# Supplementary material
Source: PubMed Central journal article supplement (PMC1805560)

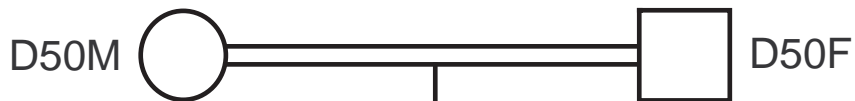

Int.6

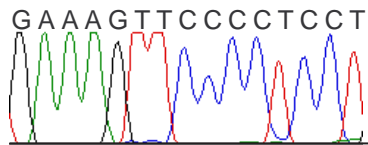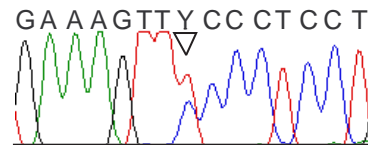

D S X P V

D S L P V

G A C A G T T W G C C G G T C

G A C A G T T T G C C G G T C

Ex.15

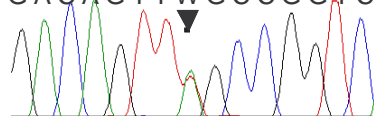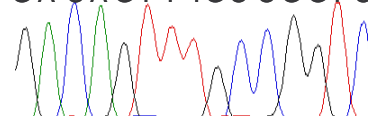

D50S1 

D50X1 

D50S2 

Int.6

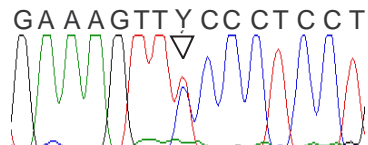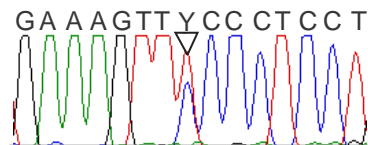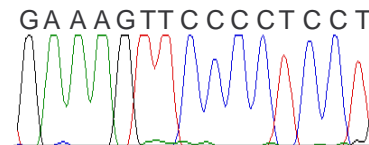

D S L P V

D S X P V

D S X P V

G A C A G T T T G C C G G T C

G A C A G T T W G C C G G T C

G A C A G T T W G C C G G T C

Ex.15

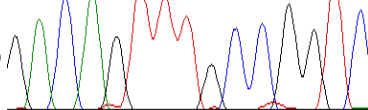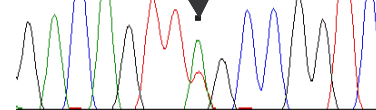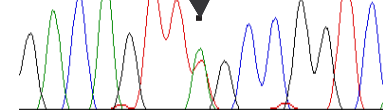

Supplement: pnas_0611405104_1.pdf [file pnas_0611405104_1.pdf]
