# Supplementary material
Source: PubMed Central journal article supplement (PMC1805560)
Supplement: pnas_0611405104_2.pdf [file pnas_0611405104_2.pdf]

A

| Individual | R ratio | SEM  |                      |
|------------|---------|------|----------------------|
| C1         | 0.42    | 0.01 |                      |
| C2         | 0.59    | 0.04 |                      |
| C3         | 0.50    | 0.03 |                      |
| C4         | 0.54    | 0.03 |                      |
| C5         | 0.53    | 0.02 |                      |
| C6         | 0.62    | 0.03 |                      |
| C7         | 0.61    | 0.04 |                      |
| C8         | 0.49    | 0.03 |                      |
| C9         | 0.58    | 0.02 |                      |
| C10        | 0.57    | 0.00 |                      |
| C11        | 0.54    | 0.04 |                      |
| C12        | 0.49    | 0.07 |                      |
| C13        | 0.58    | 0.03 |                      |
| C14        | 0.58    | 0.04 |                      |
| D50M       | 0.64    | 0.04 |                      |
| D50S2      | 0.56    | 0.01 |                      |
|            |         |      | <u>p value</u>       |
| D50S1      | 0.78    | 0.02 | $1.12 \cdot 10^{-5}$ |
| D50X1      | 0.84    | 0.02 | $9.96 \cdot 10^{-8}$ |
| D50F       | 0.85    | 0.02 | $2.09 \cdot 10^{-8}$ |
| D65X1      | 0.81    | 0.03 | $8.52 \cdot 10^{-7}$ |
| C15        | 0.69    | 0.02 | $5.18 \cdot 10^{-3}$ |

B

| Individual | R' ratio | SEM  |                      |
|------------|----------|------|----------------------|
| C1         | 0.45     | 0.03 |                      |
| C2         | 0.75     | 0.26 |                      |
| C3         | 0.72     | 0.12 |                      |
| C4         | 0.73     | 0.09 |                      |
| C5         | 0.54     | 0.19 |                      |
| C6         | 0.76     | 0.08 |                      |
| C7         | 0.75     | 0.10 |                      |
| C8         | 0.65     | 0.21 |                      |
| C9         | 0.66     | 0.11 |                      |
| C10        | 0.70     | 0.08 |                      |
| C11        | 0.69     | 0.14 |                      |
| C12        | 0.58     | 0.17 |                      |
| C13        | 0.58     | 0.11 |                      |
| C14        | 0.67     | 0.15 |                      |
| D50M       | 0.61     | 0.13 |                      |
| D50S2      | 0.79     | 0.09 |                      |
|            |          |      | <u>p value</u>       |
| D50S1      | 1.02     | 0.04 | $5.84 \cdot 10^{-5}$ |
| D50X1      | 0.91     | 0.14 | $3.90 \cdot 10^{-3}$ |
| D50F       | 1.00     | 0.07 | $1.38 \cdot 10^{-4}$ |
| D65X1      | 1.01     | 0.07 | $9.04 \cdot 10^{-5}$ |
| C15        | 0.84     | 0.13 | $2.85 \cdot 10^{-2}$ |
