# Supplementary material
Source: PubMed Central journal article supplement (PMC1805560)
Supplement: pnas_0611405104_3.pdf [file pnas_0611405104_3.pdf]

A

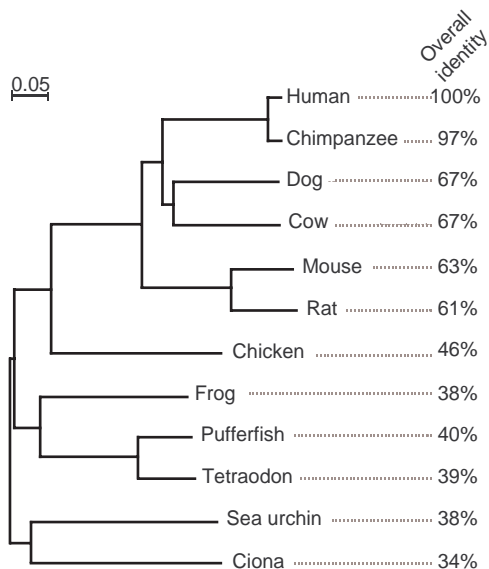

B

Conservation of the human regions encoded by  
TXNDC3 exon 7 and TXNDC6 exon 5

TXNDC3 E7    NGKII<sup>1</sup>IEKIQGANAPLVNKKVINLID<sup>2</sup>EERKIAAGEMARPQ

TXNDC6 E5    GGELVAVVIRGANAPLLQKTIIL<sup>3</sup>DQLEAEKVLAEGRERKV

C

Phylogenetic conservation of the region encoded by  
TXNDC3 exon 7

|            |                                                                                                                              |
|------------|------------------------------------------------------------------------------------------------------------------------------|
| Human      | NGKII <sup>1</sup> IEKIQGANAPLVNKKVINLID <sup>2</sup> EERKIAAGEMARPQ                                                         |
| Chimpanzee | NGKII <sup>1</sup> IEKIQGANAPLVNKKVINLID <sup>2</sup> EERKIAAGEMARPQ                                                         |
| Dog        | NGKII <sup>1</sup> IARIN <sup>4</sup> GANAPLVNKKIT <sup>5</sup> INL <sup>6</sup> INEE <sup>7</sup> KIAAGEM <sup>8</sup> VRPQ |
| Cow        | NGT <sup>1</sup> IVAKIQGANAPLVN <sup>2</sup> QKI <sup>3</sup> I <sup>4</sup> ALVNEERKIAAGEM <sup>5</sup> VRPQ                |
| Mouse      | NGKII <sup>1</sup> AKIQGANAPL <sup>2</sup> NRKVI <sup>3</sup> TLID <sup>4</sup> EERKIVAGEM <sup>5</sup> DRPQ                 |
| Rat        | NGKII <sup>1</sup> AKIQGANAPL <sup>2</sup> NRKVIALID <sup>3</sup> EERKIAAGEMARPQ                                             |
| Chicken    | NGKII <sup>1</sup> IAIVRGANAPLLSKKITELVQ <sup>2</sup> EERTLAG <sup>3</sup> QKERPE                                            |
| Frog       | GGELVAVVIRGANAPLLQKTI <sup>1</sup> IEQLA <sup>2</sup> AEKVL <sup>3</sup> SQGSERHV                                            |
| Pufferfish | GGELVGVLRGANAPLLQRMIVQ <sup>1</sup> KL <sup>2</sup> GEE <sup>3</sup> GVLEKGV <sup>4</sup> VERKV                              |
| Tetraodon  | GGELVGVLRGANAPLLQKMI <sup>1</sup> VQ <sup>2</sup> KL <sup>3</sup> SEE <sup>4</sup> GVLEKGG <sup>5</sup> ERKV                 |
| Zebrafish  | GGELVSVLRGNAPLLQKTI <sup>1</sup> QEEL <sup>2</sup> SNE <sup>3</sup> KNVLEHGGARRA                                             |
| Ciona      | GGELVAAVIRGCNAPLVQ <sup>1</sup> ETI <sup>2</sup> QETL <sup>3</sup> KNE <sup>4</sup> KI <sup>5</sup> LSGEMERKV                |
