# Supplementary material
Source: PubMed Central journal article supplement (PMC1805560)
Supplement: pnas_0611405104_5.pdf [file pnas_0611405104_5.pdf]

**Table 1. Sequences of primers used in the current study**

| Amplified region                           | Forward primer sequence                             | Reverse primer sequence                                |
|--------------------------------------------|-----------------------------------------------------|--------------------------------------------------------|
| Exon 1                                     | Fex1 5'-GAGGATTCAAAGGCGAGGAGAG-3'                   | Rex1 5'-GGGAAGAAGAAGGGGGGCAA-3'                        |
| Exon 2                                     | Fex2 5'-GAAGAGGTGGAGGATTTTAG-3'                     | Rex2 5'-AGCGTACAACAAAGGAAAAG-3'                        |
| Exons 3-4-5                                | Fex3-4-5 5'-CATAAATACAGAGATACATAAATA-3'             | Rex3-4-5 5'-AGACTATCTATTTTGAAG-3'                      |
| Exon 6                                     | Fex6 5'-TCAACATAGTGTATCAAA-3'                       | Rex6 5'-TAGTCAAGAAAAGATAAG-3'                          |
| Exon 7                                     | Fex7 5'-GTGTTAGTTCCTGGTGT-3'                        | Rex7 5'-AGCACCAGTAGTGCATTT-3'                          |
| Exon 8                                     | Fex8 5'-ACTCTTCCACTTACTTCTATTT-3'                   | Rex8 5'-GATGCTGTGATGACCGCC-3'                          |
| Exon 9                                     | Fex9 5'-ATCCTTCATTATCCAGACTT-3'                     | Rex9 5'-AGTAGTGCATTTTGTCTATT-3'                        |
| Exon 10                                    | Fex10 5'-ACGACACCTGGATTTGACCTT-3'                   | Rex10 5'-GCTTATTTTAGTTGTTTCAGACTT-3'                   |
| Exon 11                                    | Fex11 5'-CCACCATTTAGTCCATCCA-3'                     | Rex11 5'-CATTGCCCCTTAGGTACTGA-3'                       |
| Exon 12                                    | Fex12 5'-GATTTAATTTGTTGGCATGG-3'                    | Rex12 5'-GGGTTTATTCAAATCTCATC-3'                       |
| Exon 13                                    | Fex13 5'-TGATAGTATATTATGTATTGTG-3'                  | Rex13 5'-CAGCTTAAATAGAAACCAGA-3'                       |
| Exon 14                                    | Fex14 5'-ACTGAGCTACACTTCTTATT-3'                    | Rex14 5'-TCATAAGCAGTCCACTCC-3'                         |
| Exon 15                                    | Fex15 5'-GTGTTATATTATTCTGTTCTGT-3'                  | Rex15 5'-TGGAATTTTCTGTTTCTGT-3'                        |
| Exon 16                                    | Fex16 5'-CATTTTCCTTAGTTATTCAGT-3'                   | Rex16 5'-TGAATGAGATTAGATGAAATGT-3'                     |
| Exon 17                                    | Fex17 5'-GTGTTCTGTCTTTAGCCTTG-3'                    | Rex17 5'-TTCTCTTTTATAGGACAGGTTT-3'                     |
| Exon 18                                    | Fex18 5'-TGGAAACTGATAAATGCTGAA-3'                   | Rex18 5'-TTATCTTGTGTAGATTGTGTG-3'                      |
| Expression studies                         | F1 5'-TTGTGACTTTGCAGCCATTTAGAGATA-3'                | R1 5'-TAACCTTCTGAATCTGAGTCTACTAATGGAATTT-3'            |
| <i>TXNDC3fl</i> -specific quantitative PCR | F2 5'-GCTGTCGAGAAGCTGACAA-3'                        | R2 5'-TGCACCCTGAATCTTTTCGATA-3'                        |
| Quantitative PCR: both isoforms            | F3 5'-CACCGAACCTAACGAACGATCT-3'                     | R3 5'-TGTCACAGAGCTGAGCTAAATGTTG-3'                     |
| Quantitative PCR: $\beta$ 2 microglobulin  | F9 5'-ACCCCACTGAAAAAGATGA-3'                        | R9 5'-ATCTTCAAACCTCCATGATG-3'                          |
| Minigene construct                         | F4 5'-AGGACCAGGGAGGAAAAGATGAGTAA-3'                 | R4 5'-TGGAAGATGATGAAGGATGAAATAGGAAGC-3'                |
| Mutagenesis C>T                            | F5 5'-CCAAATGAAAGTTCCCTCCTGTTTTC-3'                 | R5 5'-GAAAACAGGAGGAACTTTCATTTGG-3'                     |
| Mutagenesis T>C                            | F6 5'-CCAAATGAAAGTTCCCTCCTGTTTTC-3'                 | R6 5'-GAAAACAGGAGGAACTTTCATTTGG-3'                     |
| cDNA cloning                               | F7 5'-CTCGAGGACCTGTTTTGTAGATAAATGGCAAGC-3'          | R7 5'-GTCCGACGTTTTACAGTATAATCTTTAGTTTTCC-3'            |
| Mutagenesis <i>TXNDC3fl&gt;d7</i>          | F8 5'-GTGAACCTGTTTTTCTCTTTAGTGTATCCTGAAATTCATTAG-3' | R8 5'-CTAATGGAATTCAGGATAAACACTAAAGAGAAAAACAGGTTCCAC-3' |
