# Supplementary material
Source: PubMed Central journal article supplement (PMC1805560)
Supplement: pnas_0611405104_6.pdf [file pnas_0611405104_6.pdf]

**Table 2. Sequences used for multiple alignments and phylogenetic analyses**

| <b>Sequences</b> | <b>Species</b>      | <b>Database</b> | <b>Accession no.</b> |
|------------------|---------------------|-----------------|----------------------|
| <b>Genomic</b>   | human <i>TXNDC3</i> | Ensembl         | ENSG00000086288      |
|                  | human <i>TXNDC6</i> | Ensembl         | ENSG00000181322      |
| <b>Protein</b>   | human               | Ensembl         | ENSP00000199447      |
|                  |                     | NCBI            | NP_057700            |
|                  | chimpanzee          | Ensembl         | ENSPTRP00000032615   |
|                  | dog                 | Ensembl         | ENSCAFP00000005439   |
|                  | cow                 | Ensembl         | ENSBTAP00000020410   |
|                  | mouse               | Ensembl         | ENSMUSP00000089358   |
|                  |                     | NCBI            | NP_853622            |
|                  | rat                 | NCBI            | XP_579730            |
|                  | chicken             | Ensembl         | ENSGALP00000019704   |
|                  |                     | NCBI            | XP_426021            |
|                  | frog                | NCBI            | AAH70973             |
|                  | pufferfish          | Ensembl         | SINFRUP00000145368   |
|                  | tetraodon           | Ensembl         | GSTENT00030529001    |
|                  | sea urchin          | NCBI            | P90666               |
| ciona            | NCBI                | BAB68388        |                      |
| <b>mRNA</b>      | human               | NCBI            | NM016616             |
|                  | mouse               | NCBI            | NM_181591            |
|                  | rat                 | NCBI            | XM_579730            |
|                  | ciona               | NCBI            | AB057786             |
