# Supplementary material
Source: PubMed Central journal article supplement (PMC1805560)

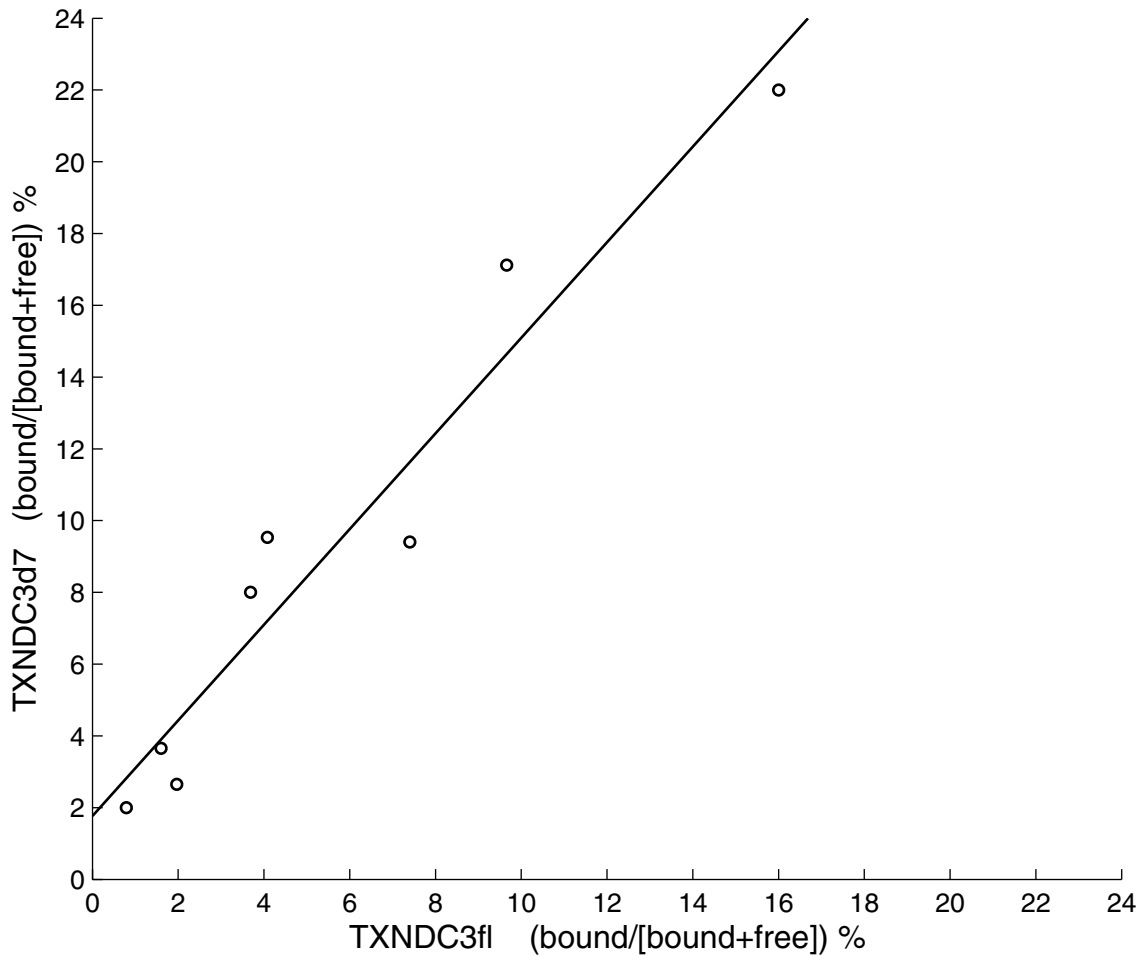

Supplement: pnas_0611405104_4.pdf [file pnas_0611405104_4.pdf]
